# Supplementary material for: A tough endothelium-like dressing for vascular stents
Source: Research Square preprint supplement (doi:10.21203/rs.3.rs-431076/v1), 2021-04-23
Supplement: Supplementary file 1 [file 7aafbbf649ec330cf10de549.docx]

A tough endothelium-like dressing for vascular stents

Yin Chen1,3†, Peng Gao2†, Lu Huang1,3, Xing Tan2, Ningling Zhou2, Tong Yang2, Hua Qiu2, Xin Dai3, Sean Michael3, Qiufen Tu2, Nan Huang2, Zhihong Guo3, Jianhua Zhou1,4*, Zhilu Yang2* and Hongkai Wu3*

1School of Biomedical Engineering, Sun Yat-sen University, Shenzhen 518107, China.

2Key Laboratory of Advanced Technologies of Materials, Ministry of Education, School of Materials Science and Engineering, Southwest Jiaotong University, Chengdu 610031, China.

3Department of Chemistry, The Hong Kong University of Science and Technology, Hong Kong, China.

4Division of Engineering in Medicine, Brigham and Women’s Hospital, Harvard Medical School, Cambridge, MA 02139, USA.

†These authors contributed equally to this work.

*e-mail: zhoujh33@mail.sysu.edu.cn; zhiluyang1029@swjtu.edu.cn; chhkwu@ust.hk

**Supplementary Fig.1 | Schematic for the synthesis of A-M.** A-M was synthesized via the coupling reaction between pristine alginate and AEM.TFA via aqueous carbodiimide chemistry.

**Supplementary Fig.2 | 1H-NMR spectra of pristine alginate and A-M of varying degrees of maleimidyl modification (DMM).** The chemical structure of A-M is presented with the assignment of peaks to the corresponding protons.

**Supplementary Fig. 3 | Cure kinetics of A-M/G hydrogels at 37 °C characterized by dynamic mechanical test. a**, Cure kinetics of the hybrid hydrogels formulated at varying mass ratios of A-M(9.3) to gelatin. **b**, Comparison in shear modulus among them after 72 h. (*n* = 3) The mass concentration of the precursor solution (pH~7.5) was 10 w/v% for both biopolymers. The dynamic mechanical test was performed at 37 °C, 5 % strain and 1 rad s-1 angular frequency.

**Supplementary Fig.4 | Summary on the tensile properties of A-M/G hydrogels at ambient temperature.** (*n* = 8) The mass concentration of the precursor solution (pH~7.5) was 15 w/v% for both biopolymers. One-way analysis of variance (ANOVA) with Tukey post-hoc test was performed to determine the difference among them. (**P* < 0.05, ***P* < 0.01, ****P* <0.001 and *****P* < 0.0001)

**Supplementary Fig.5 | Manipulation of A-M(9.3)/G_4/6 hydrogel in various manners.**

**Supplementary Fig.6 | Bright-field images (upper panels) and fluorescence images (lower panels) of vascular stents coated with poly(dopamine-co-hexanediamine) (P(DA-co-HDA)) or A-M(9.3)/G_4/6 hydrogel.**

**Supplementary Fig.7 | Scanning electron microscopy (SEM) images showing the strut surfaces of a bare-metal (316L SS) stent and a stent coated with A-M(9.3)/G_4/6 hydrogel after balloon dilation at 37 °C**

**Supplementary Fig. 8 | Energy-dispersive X-ray spectroscopy (EDS) mapping on the strut surfaces of a bare-metal stent (316L SS) (a) and a stent coated with A-M(9.3)/G_4/6 hydrogel (b) after balloon dilation at 37 °C.**

**Supplementary Fig. 9 | Schematic for the synthesis of A-D and mechanism on the formation of A-D/G hydrogel. a,** A-D synthesized through the oxidation of alginate by sodium periodate. **b**, A-D/G hydrogel formed via Schiff base reaction between the aldehyde groups in A-D and the amino groups in gelatin.

**Supplementary Fig. 10 | Cure kinetics of A-D/G hydrogels at 37 °C characterized by dynamic mechanical test. a**, Cure kinetics of the hybrid hydrogels formulated using A-D of varying degrees of oxidation (DO) and at a fixed mass ratio (4 to 6) of A-D to G. **b**, Comparison in shear modulus among them after 72 h. (*n* = 6) The mass concentration of the precursor solution (pH~7.5) was 15 w/v% for all biopolymers. The dynamic mechanical test was performed at 37 °C, 5 % strain and 1 rad s-1 angular frequency.

**Supplementary Fig.11 | Comparison in mechanical property between A-D(49.1)/G_4/6 and A-M(9.3)/G_4/6 hydrogels. a**, Comparison in shear modulus between them at 25 °C and 37 °C. (*n* = 6) The measurement was performed at 5 % strain and 1 rad s-1 angular frequency. **b**, Representative rheological behaviors of them at 37 °C. The measurements were conducted in strain sweep mode (1% to 100%) at 1 rad s-1 angular frequency. **c**, Comparison in tensile behavior between them at ambient temperature. Two-tailed Student’s *t*-test was performed to determine the difference between the hydrogels. (****P* < 0.001 and *****P* < 0.0001; n.s., not significant)

**Supplementary Fig.12 | Optical images of vascular stents coated by A-D(49.1)/G_4/6 or A-M(9.3)/G_4/6 hydrogel before and after balloon dilation at 37 °C.**

**Supplementary Fig.13 | Comparison in swelling and degradation behaviors between A-D(49.1)/G_4/6 and A-M(9.3)/G_4/6 hydrogels. a**, Change in water content of the hydrogels during one-week incubation in PBS at 37 °C. **b**, Photograph showing the setup for the mock circulatory system. **c**, Swelling ratios of the hydrogels after being flushed by PBS at 37 °C for 1 week. (*n* = 5) **d**, Degradation of them during the one-week test. (*n* = 5) Two-tailed Student’s *t*-test was performed to determine the difference between them. (**P* < 0.05, ***P* < 0.01, *****P* < 0.01)

**Supplementary Fig.14 | Comparison in optical property between A-D(49.1)/G_4/6 and A-M(9.3)/G_4/6 hydrogels.** **a**, Ultraviolet-visible (UV-Vis) spectra of the hydrogels. The insets display the images of them in plastic cuvettes. (left: A-D(49.1)/G_4/6; right: A-M(9.3)/G_4/6). **b**, Fluorescence spectra of them (Ex: 488 nm).

**Supplementary Fig.15 | Comparison in cytocompatibility between A-D(49.1) and A-M(9.3). a**, Viabilities of HUVECs after incubation with A-D(49.1) or A-M(9.3) at varying concentrations for up to 1 week. (*n* = 5) **b**, Change in density of HUVECs since incubation with A-D(49.1) or A-M(9.3) at varying concentrations for up to 1 week. (*n* = 5) **c**, Flow cytometry of HUVECs after incubation with 1 mg mL-1 A-D(49.1) or A-M(9.3) for up to 1 week. The subpopulations of HUVECs that are quiescent (R1), mitotic (R2), or apoptotic (R3) are marked. 10,000 to 20,000 cells were counted for each group at a designated time. (a.u., arbitrary unit) Two-tailed Student’s *t*-test was performed to determine the difference between two groups. (**P* < 0.05 and ***P* < 0.01)

**Supplementary Fig.16 | Schematic for the syntheses of gelatin glycinamide (GelGA) and gelatin methacrylate (GelMA). a**, Synthesis of GelGA through the conjugation of glycinamide to the glutamic acid and aspartic acid residues of gelatin. **b,** Synthesis of GelMA via the coupling reaction between the lysine residue of gelatin and methacrylic anhydride.

**Supplementary Fig.17 | 1H-NMR spectra of pristine gelatin, GelGA and GelMA.** The chemical structures of the modified amino acid residues are presented with the assignment of peaks to the corresponding protons.

**Supplementary Fig.18 | Effects of chemical modifications on the gelation potency of gelatin. a**, comparison in shear modulus among pristine gelatin, GelGA and GelMA hydrogels at ambient temperature. (*n* = 6) **b**, Comparison in melting points among the hydrogels. (*n* = 6) The melting point is defined as the temperature at which the shear modulus of a hydrogel is reduced by a half from that at ambient temperature. The mass concentration of the precursor solution (pH~7.5) was 15 w/v% for all biopolymers. One-way ANOVA with Tukey post-hoc test was performed to determine the difference among various hydrogels. (*****P* < 0.0001)

**Supplementary Fig.19 | Comparison in tensile property among pristine gelatin, GelGA and GelMA hydrogels at ambient temperature.** (*n* = 8) One-way ANOVA with Tukey post-hoc test was performed to determine the difference among various hydrogels. (####*P* < 0.0001 compared to other groups; **P* < 0.05, ***P* < 0.01, ****P* < 0.001 and *****P* < 0.0001 between two groups)

**Supplementary Fig.20 | Comparison in tensile property among A-M(9.3)/G_4/6, A-M(9.3)/GG_4/6 and A/G_4/6 hydrogels.** (*n* = 8) One-way ANOVA with Tukey post-hoc test was performed to determine the difference among various hydrogels. (####*P* < 0.0001 compared to other groups; ***P* < 0.01 and *****P* < 0.0001 between two groups)

**Supplementary Fig.21 | Optical images of metal springs coated by A-M(9.3)/G_4/6, Gelatin or GelMA (illuminated by UV** **for 30 min) hydrogel before and after 1,000 cycles of stretching and compressing at ambient temperature.**

**Supplementary Fig.22 | Comparison in tensile property among GelMA hydrogels and A-M(9.3)/G_4/6 hydrogel at ambient temperature.** (*n* = 8)Two-tailed Student’s *t*-test was performed to determine the difference among various hydrogels. (####*P* < 0.0001 compared to other groups; **P* < 0.05, ***P* < 0.01, ****P* < 0.001 and *****P* < 0.0001 between two groups)

**Supplementary Fig.23 | Optical images of vascular stents coated by A-M(9.3)/G_4/6 or GelMA (illuminated by UV for 30 min) hydrogel before and after balloon dilation at 37 °C.**

**Supplementary Fig.24 | NO generation catalyzed by the EL dressings. a**, Determination of SeCA conjugated to A-M(9.3) by ICP-MS. The mass concentration of the work solution for SeCA-conjugated A-M(9,3) was 20 mg mL-1. **b**, Quantification on the burst release ratios of NO catalyzed by the EL dressings. **c**, Representative curve of NO release from GSNO (10 μM in PBS at 37 °C) catalyzed by the EL dressing conjugated with 1.0 mM SeCA. The release rate of NO declined upon the removal of the hydrogel from the solution, but then returned to the original value after re-submergence.

**Supplementary Fig.25 | Clustering assay showing the general variations in gene expression of HUASMCs among different groups and replicates.**

**Supplementary Fig.26 | Mechanical Stability of the EL dressing (conjugated with 1.0 mM SeCA) on a bare-metal stent (316L SS) tested by mock angioplasty in a catheter. a**, Photograph of the EL dressing-coated stent implanted into a PVC catheter. **b-f**, fluorescence images showing the preservation of the EL dressing on the stent after being flushed by PBS at 37 °C for different durations. The EL dressing was labeled with FITC.

**Supplementary Fig.27 | *Ex vivo* thrombogenicity test of the EL dressings.** **a**, Schematic illustration for the arteriovenous extracorporeal circuit established on rabbits. **b**, Photographs of the thrombi formed on various substrates. (Upper panel: cross-sections of the catheters containing the samples after the *ex vivo* thrombogenicity test; lower panel: thrombi on the expanded samples; scale bar: 1 mm). **c**, Quantitative assessment on the thrombogenicities of various substrates (*n* = 8). **d**, SEM images of thrombi on various substrates. One-way ANOVA with Tukey post-hoc test was performed to determine the difference among various groups. (**P* < 0.05, ***P* < 0.01, ****P* < 0.001 and *****P* < 0.0001)

**Supplementary Fig.28 | Photos showing the process of stent implantation in the iliac arteries of a rabbit (a) and the stented arteries (b).**

**Supplementary Fig.29 | SEM images showing the luminal faces of stented arteries at 1 week post stent deployment in a New Zealand rabbit.**

**Supplementary Fig.30 | SEM images showing the luminal faces of stented arteries at 1 month post stent deployment in a New Zealand rabbit.**

**Supplementary Fig.31 | Photos showing the process of stent implantation in the coronary arteries of a Bama miniature pig.**

**Supplementary Fig.32 | SEM images showing the luminal faces of stented arteries at 2 weeks post stent deployment in a Bama miniature pig.**

**Supplementary Fig.33 | SEM images showing the luminal faces of stented arteries at 3 months post stent deployment in a Bama miniature pig.**

**Supplementary Fig.34 | Release profiles of Rhodamine B (a) and fluorescein isothiocyanate (FITC)-labeled bovine serum albumin (BSA) (b) from the EL dressing incubated in PBS at 37 °C.**

**Supplementary Table 1 | Comparison of our stents with other stents**

| **Name of stents** | **Stent designs** | | | **Thrombogenicity** | **Endothelialization** | | | **In-stent restenosis (%)** | | |
| --- | --- | --- | --- | --- | --- | --- | --- | --- | --- | --- |
| Stent base | Stent coating | Therapeutics | 1 week | 1 month | 3 months | 1 week | 1 month | 3 months |
| **I. Drug eluting stents (DESs)** | | | | | | | | | | |
| **EL dressing-coated stent (our data)** | **316L SS** | **Hydrogel** | **Nitric oxide** | **Low** | **Complete** | **Complete** | **Complete** | **11.1±2.7** | **13.7±6.1** | **19.4±5.4** |
| Akt1 siRNA-eluting stent1 | CoCr | BRP | Akt1 siRNA | Low | NA | NA | NA | NA | 9.4±1.6 | NA |
| D65495-eluting stent2 | CoCr | None | D65495 | High | NA | Complete | Complete | NA | 7.9±2.2 | NA |
| Cerivastatin-eluting stent3 | CoCr | Silica sol-gel | Cerivastatin | Low | NA | Complete | Complete | NA | 15.0±6.0 | NA |
| Gene-eluting stent4 | SS | NBRP | 7ND cDNA | Low | NA | Complete | Complete | NA | 24.6±5.2 | NA |
| Paclitaxel and NO-eluting stent5 | SS | NBRP | Paclitaxel & Nitric oxide | Low | NA | NA | NA | NA | 15.0±5.1 | NA |
| Corolimus-eluting stent6 | CoCr | Crosslinked omega-3 fatty acid | Corolimus | Low | NA | NA | NA | NA | NA | 22.3±10.0 |
| miR-145-eluting stent7 | CoCr | BRP | miR-145 | Low | NA | NA | NA | NA | 15.2±5.2 | NA |
| NO-eluting stent8 | 316L SS | EPC-targeting peptide | Nitric oxide | Low | Complete | Complete | Complete | NA | 18.3±2.2 | 20.2±1.4 |
| 6-mercaptopurine-eluting stent9 | CoCr | BRP | 6-mercaptopurine | High | Complete | Complete | Complete | NA | 14.9±1.0 | NA |
| Sirolimus-eluting stent10 | CoCr | NBRP | Sirolimus | Low | Incomplete | Incomplete | NA | NA | 13.7±5.3 | NA |
| Zotarolimus-eluting stent10 | CoCr | NBRP | Zotarolimus | Low | Incomplete | Incomplete | NA | NA | 13.7±6.1 | NA |
| Everolimus-eluting stent10 | CoCr | NBRP | Everolimus | Low | Incomplete | Incomplete | NA | NA | 13.7±6.2 | NA |
| NF-κB decoy-eluting stent11 | SS | NBRP | NF-κB | High | NA | Complete | Complete | NA | 41.5±6.2 | NA |
| XIENCE V®12 | CoCr | NBRP | Everolimus | Low | Incomplete | Incomplete | NA | NA | NA | NA |
| Atorvastatin-eluting stent13 | CoCr | BRP | Atorvastatin | High | NA | NA | NA | NA | 14.8±5.1 | NA |
| Endeavor®12,14 | CoCr | NBRP | Zotarolimus | Low | Incomplete | Incomplete | Incomplete | NA | 14.3±4.1 | 15.4±2.4 |
| Bevacizumab-eluting stent15 | 316L SS | Phosphorylcholine | Bevacizumab | Low | Incomplete | Incomplete | NA | NA | 16.7±1.6 | NA |
| Taxus Liberté®12 | 316L SS | NBRP | Paclitaxel | High | Incomplete | Incomplete | NA | NA | NA | NA |
| Synergy®16 | PtCr | BRP | Everolimus | High | Incomplete | Incomplete | NA | NA | NA | NA |
| BioMatrix Flex®16 | 316L SS | BRP | Biolimus A9 | High | Incomplete | Incomplete | NA | NA | NA | NA |
| Cypher®12,14 | 316L SS | NBRP | Sirolimus | High | Incomplete | Incomplete | Incomplete | NA | 8.8±4.1 | 20.1±9.0 |
| Taxus Element®17 | PtCr | NBRP | Paclitaxel | High | Incomplete | Incomplete | NA | NA | 21.6±5.8 | NA |
| *c*RGD-eluting stent18 | CoCr | None | *c*RGD peptide | High | Incomplete | Incomplete | NA | NA | 23.4±7.0 | NA |
| Taxus Express®17 | 316L SS | NBRP | Paclitaxel | High | Incomplete | Incomplete | NA | NA | 25.2±7.1 | NA |
| As2O3- eluting stent19 | SS | BRP | Arsenic trioxide | High | Incomplete | Incomplete | NA | NA | 26.1±6.1 | NA |
| D24851-eluting stent20 | SS | BRP | D24851 | High | Incomplete | Incomplete | Incomplete | NA | 20.2±5.2 | NA |
| **II. Bare metal stents (BMSs)** | | | | | | | | | | |
| **BMS (our control)** | 316L SS | None | None | High | Incomplete | Complete | Complete | 8.3±2.7 | 20.3±6.4 | 31.2±6.9 |
| BMS21 | Ti | None | None | Low | NA | NA | NA | NA | 20.0±3.8 | NA |
| Driver®[1](#_ENREF_1) | CoCr | None | None | High | Incomplete | Complete | Complete | NA | 19.5±9.7 | 10.0±2.8 |
| R-Stent Evolution 222 | 316L SS | None | None | High | NA | Complete | Complete | NA | 23.3±11.3 | NA |
| BMS21 | SS | None | None | High | NA | NA | NA | NA | 24.8±7.5 | NA |

**Supplementary Table 1 | Comparison of our stents with other stents (Continued)**

| **II. Bare metal stents (BMSs) (Continued)** | | | | | | | | | | |
| --- | --- | --- | --- | --- | --- | --- | --- | --- | --- | --- |
| Coroflex Blue®23 | CoCr | None | None | High | NA | NA | NA | NA | 31.0±10.2 | NA |
| CNUH23 | CoCr | None | None | High | NA | NA | NA | NA | 35.0±18.6 | NA |
| ACS Multilink Duet®24 | 316L SS | None | None | High | NA | Complete | Complete | NA | 25.9±1.2 | 31.9±4.4 |
| MULTI-LINK Vision®10 | CoCr | None | None | High | Incomplete | Complete | NA | NA | 20.7±6.3 | NA |
| Bx Velocity®17 | 316L SS | None | None | High | Incomplete | Incomplete | NA | NA | 25.7±3.5 | NA |
| **III. Fully bioresorbable stent** | | | | | | | | | | |
| Absorb BVS®16,25 | BRP | BRP | Everolimus | High | Incomplete | Incomplete | Incomplete | NA | NA | 30.4±3.0 |
| **IV. Other stents** | | | | | | | | | | |
| REDV-immobilized stent26 | 316L SS | REDV-immobilized NBRP | None | Low | Complete | Complete | Complete | NA | 41.0±1.9 | NA |
| Anti-ApoA-I-immobilized stent22 | 316L SS | Anti-ApoA-I antibody | None | Low | NA | Complete | Complete | NA | 23.3±13.8 | NA |
| TiO2 nanotube-coated stent21 | Ti | TiO2 nanotube | None | Low | NA | NA | NA | NA | 17.2±1.1 | NA |
| VEGF-immobilized stent27 | 316L SS | VEGF-immobilized BRP | None | High | NA | Complete | Complete | NA | 42.6±5.0 | NA |
| Plasma polymer-coated stent28 | 316L SS | Plasma polymer | None | Low | Incomplete | NA | NA | 12.1±1.2 | NA | NA |
| TENAX®29 | 316L SS | Silicon carbide | None | High | NA | NA | NA | NA | 15.2±3.1 | NA |
| BX Isostent®30 | SS | 32P coating | β particle | High | Incomplete | Incomplete | Incomplete | NA | NA | 11.5±3.0 |
| Heparin-immobilized stent31 | CoCr | Heparin-immobilized BRP | None | Low | Incomplete | Incomplete | NA | NA | 39.0±28.7 | NA |

SS: Stainless steel; CoCr: Cobalt chromium alloy; PtCr: Platinum chromium alloy; Ti: Titanium; BRP: Bioresorbable polymer; NBRP: Non-bioresorbalbe polymer; NA: Not available

Low Property inferior to that of our EL dressing-coated stent

Low Property comparable to that of our EL dressing-coated stent

Low Property superior to that of our EL dressing-coated stent

**A-M/G hydrogel versus A-D/G hydrogel**

A-D/G hydrogel has been widely applied in tissue engineering and drug delivery systems, but we think it is incompetent as a coating material on vascular implants owing to its imine crosslinks that are prone to hydrolysis. To corroborate this, we synthesized a series of A-D with varying degrees of oxidation (DO) according to the protocol published by Jayakrishnan et al.32 (Supplementary Fig. 9) and named them as A-D(*y*), for which *y*% of the structural units in alginate was oxidized. Likewise, three variants of A-D were produced, including A-D(10.0), A-D(25.0) and A-D(49.1). A-D/G hydrogels were made at the fixed mass ratio of 4 to 6 for A-D to gelatin using the same protocol for A-M/G hydrogels. The cure kinetics of A-D/G hydrogels (Supplementary Fig. 10a) were slightly faster than those of A-M/G hydrogels, with 24 h being sufficient for them to be fully cured at pH 7.5 and 37 °C. However, to approach the shear modulus of A-M(9.3)/G_4/6, the DO of A-D should be at least about 50% in A-D/G hydrogels. When the DO of A-D was as low as 10%, only viscous liquids or extremely weak hydrogels were obtained. This phenomenon is ascribed to the nature of dynamic covalent bond for imine, which endlessly undergoes reversible reactions between condensation and hydrolysis (Supplementary Fig. 9). To achieve the same crosslinking density, the DO of A-D must be much larger than the DMM of A-M.

Since the shear modulus of A-D(49.1)/G_4/6 (1.00 kPa) is close to that of A-M(9.3)/G_4/6 (1.38 kPa) at 37 °C (Supplementary Fig. 11a), we further compared their rheological properties. Dynamic mechanical test performed in strain sweep mode (37 °C) disclosed A-D(49.1)/G_4/6 readily yielded and behaved like a liquid (*G*’ < *G*’’) at low shear strain (14.6%, *n* = 6) whereas A-M(9.3)/G_4/6 was still robust and preserved the gel state (*G*’ > *G*’’) even if shear strain reached 100% (Supplementary Fig. 11b). Because the physical crosslinks in gelatin are completely unleashed beyond its *T*m, the difference in rheological behavior between them at 37 °C reflects that imine is much less refractory to shear stress than the chemical bond formed between maleimidyl and amino groups. In addition, tensile testing (Supplementary Fig. 11c) revealed although they presented comparable fracture strains (*P* = 0.8266), the fracture strength and toughness of A-D(49.1)/G_4/6 were significantly (*P* < 0.0001) lower than those of A-M(9.3)/G_4/6 due to the smaller Young’s modulus. We envision that the high DO of A-D(49.1) also impairs the coil-helix transition of gelatin, thereby leading to the weaker mechanical strength of A-D(49.1)/G_4/6. We also tested A-D(49.1)/G_4/6 on the vascular stent with balloon dilation at 37 °C, and found this hydrogel coating was partially fractured and peeled off the struts after the test (Supplementary Fig. 12).

We have aforementioned imine is prone to hydrolysis. To ascertain the effects of this character on A-D/G hydrogels, the swelling and degradation behaviors of A-D(49.1)/G_4/6 were compared with those of A-M(9.3)/G_4/6 in PBS at 37 °C. Both hydrogels expanded (Supplementary Fig. 13a) upon contact with PBS due to osmosis of water. The absorption of water quickly reached equilibrium in A-M(9.3)/G_4/6. However, A-D(49.1)/G_4/6 experienced a sudden expansion in the first 3 h, and then gradually shrank until equilibrium in 2 days. Likewise, the difference in swelling behavior between them can be explained by the dynamic nature of imine, which enables the rapid rearrangement of polymer chains within the 3D network of A-D(49.1)/G_4/6 to minimize the internal stress caused by swelling and exclude excessive water. To simulate the flushing of blood flow against the hydrogel coating, we established a simple mock circulatory system (Supplementary Fig. 13b). 3l6L stainless steel foils coated with A-D(49.1)/G_4/6 or A-M(9.3)/G_4/6 were constantly flushed by PBS (37 °C, *v* = 28.3 cm s-1) for 1 week. After the experiment, we noted the swelling ratio of A-D(49.1)/G_4/6 slightly increased from 7.5 to 9.4, and it was significantly lower (*P* < 0.05) than that (12.4) of A-M(9.3)/G_4/6 as anticipated (Supplementary Fig. 13c). Nonetheless, A-M(9.3)/G_4/6 demonstrated much better stability in the fluidic context with a flow velocity comparable to that in human coronary artery33. Nearly 90% of A-M(9.3)/G_4/6 remained while more than a half of A-D(49.1)/G_4/6 degraded (Supplementary Fig. 13d). Such differences imply that being a dynamic crosslink, imine could accelerate the degradation of a hydrogel, which is not desired as endothelialization on vascular stents takes time.

Our A-M(9.3)/G_4/6 hydrogel was developed for the application in cardiovascular system so that its cytocompatibility needed to be determined before preclinical studies. We expected A-M(9.3)/G_4/6 to be more cytocompatible than A-D(49.1)/G_4/6 due to the low DMM of A-M(9.3) and high DO of A-D(49.1). Because A-D(49.1)/G_4/6 displays dark red with a broad absorption peak around 500 nm and relatively strong fluorescence around 547 nm (Supplementary Fig. 14) that have interference to conventional colorimetric analyses, we evaluated the cytocompatibilities of A-D(49.1) and A-M(9.3) biopolymers. Human umbilical vein endothelial cells (HUVECs) were incubated with A-D(49.1) or A-M(9.3) for up to 1 week. Our results (Supplementary Fig. 15a) show the cell viability was unaffected by A-M(9.3) in 1 weak even if the concentration of it in the medium was as high as 10 mg mL-1. For A-D(49.1), almost no dead cells were recognized when the concentration of it was no more than 1 mg mL-1. However, at the concentration of 10 mg mL-1, 15% of cells died in just 1 day and only 22% survived in 1 week. In addition, we calculated the cell densities and found the proliferation of HUVECs was evidently inhibited by both biopolymers when their concentrations were beyond 10 μg mL-1 (Supplementary Fig. 15b). Nevertheless, A-M(9.3) demonstrated to be remarkably less cytotoxic. At the concentration of 1 mg mL-1, the cell density decreased from 344 cells mm-2 at day 1 to 138 cells mm-2 at day 7 for A-D(49.1), whereas it increased from 352 cells mm-2 at day 1 to 534 cells mm-2 at day 7 for A-M(9.3). To our surprise, the cell density did not change during incubation with 10 mg mL-1 A-D(49.1), and it was even significantly (*P* < 0.05) higher than that with 1 mg mL-1 A-D(49.1) for 1 week. At first glance, this seemed to be contradictory to the data of cell viability. With careful examination, we noted the cells were actually fixed by the biopolymers at the concentration of 10 mg mL-1 as even trypsin was unable to detach them. However, the fixation of cells by A-D(49.1) was not very efficient as a large proportion of cells were lost. Consequently, the cell viabilities were not accurate to reflect the real cytocompatibilities of the biopolymers because dead cells might have detached from the substrate during incubation. Nonetheless, we believed the remaining live cells treated by different biopolymers should have distinct characters. To corroborate this, we determined the expression level of Ki-67 and the flip-flop of phosphatidylserine (by annexin V) in HUVECs after incubation with 1 mg mL-1 A-D(49.1) or A-M(9.3) using flow cytometry. Cells at normal culture were used as the control. Our data (Supplementary Fig. 15c) unveiled few cells were undergoing apoptosis in all three groups at the first day, but the subpopulation of proliferating cells was slightly larger in the control group than in the two experimental groups. After 1 week, distinctive patterns of cell distribution were observed, with the subpopulation of apoptotic cells nearly tenfold higher in A-D(49.1) group than those in A-M(9.3) and the control groups. In addition, the subpopulations of proliferating cells in both A-D(49.1) and A-M(9.3) groups were much smaller than that in the control group. These results clearly indicated A-D(49.1) not only inhibited cell proliferation, but also induced cell apoptosis, whereas A-M(9.3) only suppressed cell proliferation. Consequently, A-M(9.3)/G_4/6 has good cytocompatibility.

**Thrombogenicities of the EL dressings**

Blood coagulation is a mechanism to stop bleeding and prevent overexposure to infectious agents in the environment when injury occurs. However, it is also a barrier for angioplasty because the unavoidable damage to vessel wall will induce the release of tissue factors that can activate thrombin and platelets34, thereby triggering clotting cascade on the implant. NO is capable of activating guanylate cyclase, which catalyzes the production of cyclic guanosine monophosphate (cGMP) that can inhibit the activation and aggregation of platelets35. Due to the capacity to catalyze the degradation of RSNO into NO, our EL dressings were supposed to possess anti-coagulant potency upon the supplementation of NO donors in blood. To assess their thrombogenicities, we established an arteriovenous extracorporeal circuit model on rabbits (Supplementary Fig. 27a). The circuit consisted of four catheters that were connected to a carotid artery and a jugular vein of a rabbit through two connecting hoses. Each of the four catheters contained a specimen and was constantly flushed by blood flow during the test.

After the *ex vivo* test, catheters containing a bare stainless steel foil were severely occluded by thrombi (Supplementary Fig. 27b). For those foils with a coating, thrombus formation varied dramatically. The thrombogenicity of the blank hydrogel seemed to be on par with that of bare stainless steel. In fact, quantitative assessment (Supplementary Fig. 27c) indicated no significant difference between bare stainless steel and the blank hydrogel in terms of the occlusion and patency of the host catheter, as well as the thrombus weight on the foil. However, with the introduction of SeCA, the EL dressings became anti-coagulant. For the EL dressing conjugated with 0.2 mM SeCA, the occlusion of the host catheter decreased from 67.2% to 20.3% (*P* < 0.0001) with the thrombus weight reduced from 25.4 mg to 6.8 mg (*P* < 0.0001), whereas the patency of it increased from 47.9% to 73.5%. With the content of conjugated SeCA increased to 1.0 mM, the EL dressing became even non-thrombogenic as almost no thrombus could be seen on any specimen of it with naked eyes (Supplementary Fig. 27b). Consequently, the host catheters presented low occlusion (2.4%) and high patency (93.9%) after the *ex vivo* test, approaching the values of empty ones. Scanning electron microscope (SEM) displayed the magnified details of the thrombi formed on various substrates (Supplementary Fig. 27d). The thrombi on the bare stainless steel foil and blank hydrogel coating were mainly thick aggregations of erythrocytes interwoven with dense filaments. These filaments were believed be the assemblies of fibrin originating from the hydrolysis of fibrinogen catalyzed by thrombin, which played an important role in the process of blood coagulation36. In stark contrast, the thrombus formed on the EL dressing conjugated with 0.2 mM SeCA was only a thin layer of filaments dispersed with sparse erythrocytes and tiny floccules. These floccules might be the precipitates of some plasma proteins, but we were unable to determine their composition. Excitingly, when the content of conjugated SeCA increased to 1.0 mM, only sporadic blood cells and floccules were found on the EL dressing. Taken together, these results confirmed the NO generation catalyzed by the EL dressing could effectively retard the process of blood coagulation or even completely inhibit it depending on the content of conjugated SeCA.

**References**

1. Che, H.-L. et al. Therapeutic effect of Akt1 siRNA nanoparticle eluting coronary stent on suppression of post-angioplasty restenosis. *J. Biomed. Nanotechnol.* **12**, 1211-1222 (2016).

2. Jandt, E. et al. Stent-based release of a selective PDGF-receptor blocker from the bis-indolylmethanon class inhibits restenosis in the rabbit animal model. *Vasc. Pharmacol.* **52**, 55-62 (2010).

3. Pendyala, L.K. et al. Polymer-free cerivastatin-eluting stent shows superior neointimal inhibition with preserved vasomotor function compared to polymer-based paclitaxel-eluting stent in rabbit iliac arteries. *Eurointervention* **6**, 126-133 (2010).

4. Egashira, K. et al. Local delivery of anti-monocyte chemoattractant protein-1 by gene-eluting stents attenuates in-stent stenosis in rabbits and monkeys. *Arterioscler., Thromb., Vasc. Biol.* **27**, 2563-2568 (2007).

5. Lin, C.-E. et al. Combination of paclitaxel and nitric oxide as a novel treatment for the reduction of restenosis. *J. Med. Chem.* **47**, 2276-2282 (2004).

6. Artzi, N. et al. Sustained efficacy and arterial drug retention by a fast drug eluting cross-linked fatty acid coronary stent coating. *Ann. Biomed. Eng.* **44**, 276-286 (2016).

7. Che, H.-L. et al. Novel fabrication of microRNA nanoparticle-coated coronary stent for prevention of post-angioplasty restenosis. *Korean Circ. J.* **46**, 23-32 (2016).

8. Yang, Z.et al. Bioclickable and mussel adhesive peptide mimics for engineering vascular stent surfaces. *Proc. Natl. Acad. Sci. USA* **117**, 16127-16137 (2020).

9. Ruiter, M.S. et al. Stents eluting 6-mercaptopurine reduce neointima formation and inflammation while enhancing strut coverage in rabbits. *PLoS One* **10**, e0138459 (2015).

10. Steigerwald, K. et al. Vascular healing in drug-eluting stents: differential drug-associated response of limus-eluting stents in a preclinical model of stent implantation. *Eurointervention* **8**, 752-759 (2012).

11. Ohtani, K. et al. Stent-based local delivery of nuclear factor-κB decoy attenuates in-stent restenosis in hypercholesterolemic rabbits. *Circulation* **114**, 2773-2779 (2006).

12. Joner, M. et al. Endothelial cell recovery between comparator polymer-based drug-eluting stents. *J. Am. Col.l Cardiol.* **52**, 333-342 (2008).

13. Lim, K.S. et al. Effect of atorvastatin-eluting stents in a rabbit iliac artery restenosis model. *Chonnam Med. J.* **49**, 118-124 (2013).

14. Nakazawa, G., Finn, A.V., John, M.C., Kolodgie, F.D. & Virmani, R. The significance of preclinical evaluation of sirolimus-, paclitaxel-, and zotarolimus-eluting stents. *Am. J. Cardiol.* **100**, S36-S44 (2007).

15. Stefanadis, C. et al. Inhibition of plaque neovascularization and intimal hyperplasia by specific targeting vascular endothelial growth factor with bevacizumab-eluting stent: an experimental study. *Atherosclerosis* **195**, 269-276 (2007).

16. Koppara, T. et al. Thrombogenicity and early vascular healing response in metallic biodegradable polymer-based and fully bioabsorbable drug-eluting stents. *Circ.: Cardiovasc. Interventions* **8**, e002427 (2015).

17. Finn, A.V. et al. Differential response of delayed healing and persistent inflammation at sites of overlapping sirolimus- or paclitaxel-eluting stents. *Circulation* **112**, 270-278 (2005).

18. Rechenmacher, F. et al. The integrin ligand *c*(RGDf(*N*Me)Nal) reduces neointimal hyperplasia in a polymer-free drug-eluting stent system. *ChemMedChem* **9**, 1413-1418 (2014).

19. Yang, W. et al. Arsenic trioxide eluting stent reduces neointima formation in a rabbit iliac artery injury model. *Cardiovasc. Res.* **72**, 483-493 (2006).

20. Lysitsas, D.N. et al. Antirestenotic effects of a novel polymer-coated d-24851 eluting stent. experimental data in a rabbit iliac artery model. *Cardiovasc. Intervent. Radiol.* **30**, 1192-1200 (2007).

21. Nuhn, H., Blanco, C.E. & Desai, T.A. Nanoengineered stent surface to reduce in-stent restenosis *in vivo*. *ACS Appl. Mater. Interfaces* **9**, 19677-19686 (2017).

22. Strang, A.C. et al. Effect of anti-ApoA-I antibody-coating of stents on neointima formation in a rabbit balloon-injury model. *PLoS One* **10**, e0122836 (2015).

23. Bae, I.H. et al. Mechanical behavior and *in vivo* properties of newly designed bare metal stent for enhanced flexibility. *J. Ind. Eng. Chem.* **21**, 1295-1300 (2015).

24. Kolodgie, F.D. et al. Sustained reduction of in-stent neointimal growth with the use of a novel systemic nanoparticle paclitaxel. *Circulation* **106**, 1195-1198 (2002).

25. Vorpahl, M. et al. Vascular healing and integration of a fully bioresorbable everolimus-eluting scaffold in a rabbit iliac arterial model. *Eurointervention* **10**, 833-841 (2014).

26. Wei, Y. et al. Surface engineering of cardiovascular stent with endothelial cell selectivity for *in vivo* re-endothelialisation. *Biomaterials* **34**, 2588-2599 (2013).

27. Wang, J.-L. et al. Electropolymerization of dopamine for surface modification of complex-shaped cardiovascular stents. *Biomaterials* **35**, 7679-7689 (2014).

28. Waterhouse, A. et al. *In vivo* biocompatibility of a plasma-activated, coronary stent coating. *Biomaterials* **33**, 7984-7992 (2012).

29. Robert, R. et al. Experimental assessment of new stent technologies: validation of a comparative paired rabbit iliac artery study model. *J. Biomed. Mater. Res., Part B* **70B**, 303-310 (2004).

30. Farb, A., Tang, A.L., Shroff, S., Sweet, W. & Virmani, R. Neointimal responses 3 months after 32P β-emitting stent placement. *Int. J. Radiat. Oncol., Biol., Phys.* **48**, 889-898 (2000).

31. Bae, I.-H., Park, I.-K., Park, D.S., Lee, H. & Jeong, M.H. Thromboresistant and endothelialization effects of dopamine-mediated heparin coating on a stent material surface. *J. Mater. Sci.: Mater. Med.* **23**, 1259-1269 (2012).

32. Balakrishnan, B. & Jayakrishnan, A. Self-cross-linking biopolymers as injectable *in situ* forming biodegradable scaffolds. *Biomaterials* **26**, 3941-3951 (2005).

33. Segal, J. et al. Alterations of phasic coronary artery flow velocity in humans during percutaneous coronary angioplasty. *J. Am. Coll. Cardiol.* **20**, 276-286 (1992).

34. Mackman, N., Tilley, R.E. & Key, N.S. Role of the extrinsic pathway of blood coagulation in hemostasis and thrombosis. *Arterioscler., Thromb., Vasc. Biol.* **27**, 1687-1693 (2007).

35. Bellamy, T.C., Wood, J. & Garthwaite, J. On the activation of soluble guanylyl cyclase by nitric oxide. *Proc. Natl. Acad. Sci. USA* **99**, 507-510 (2002).

36. Kattula, S., Byrnes, J.R. & Wolberg, A.S. Fibrinogen and fibrin in hemostasis and thrombosis. *Arterioscler., Thromb., Vasc. Biol.* **37**, e13-e21 (2017).
